# Supplementary figures and images for: TPL2 kinase activity regulates microglial inflammatory responses and promotes neurodegeneration in tauopathy mice
Source: eLife journal article supplement (doi:10.7554/elife.83451), 2023-07-31

Figure 1A source data

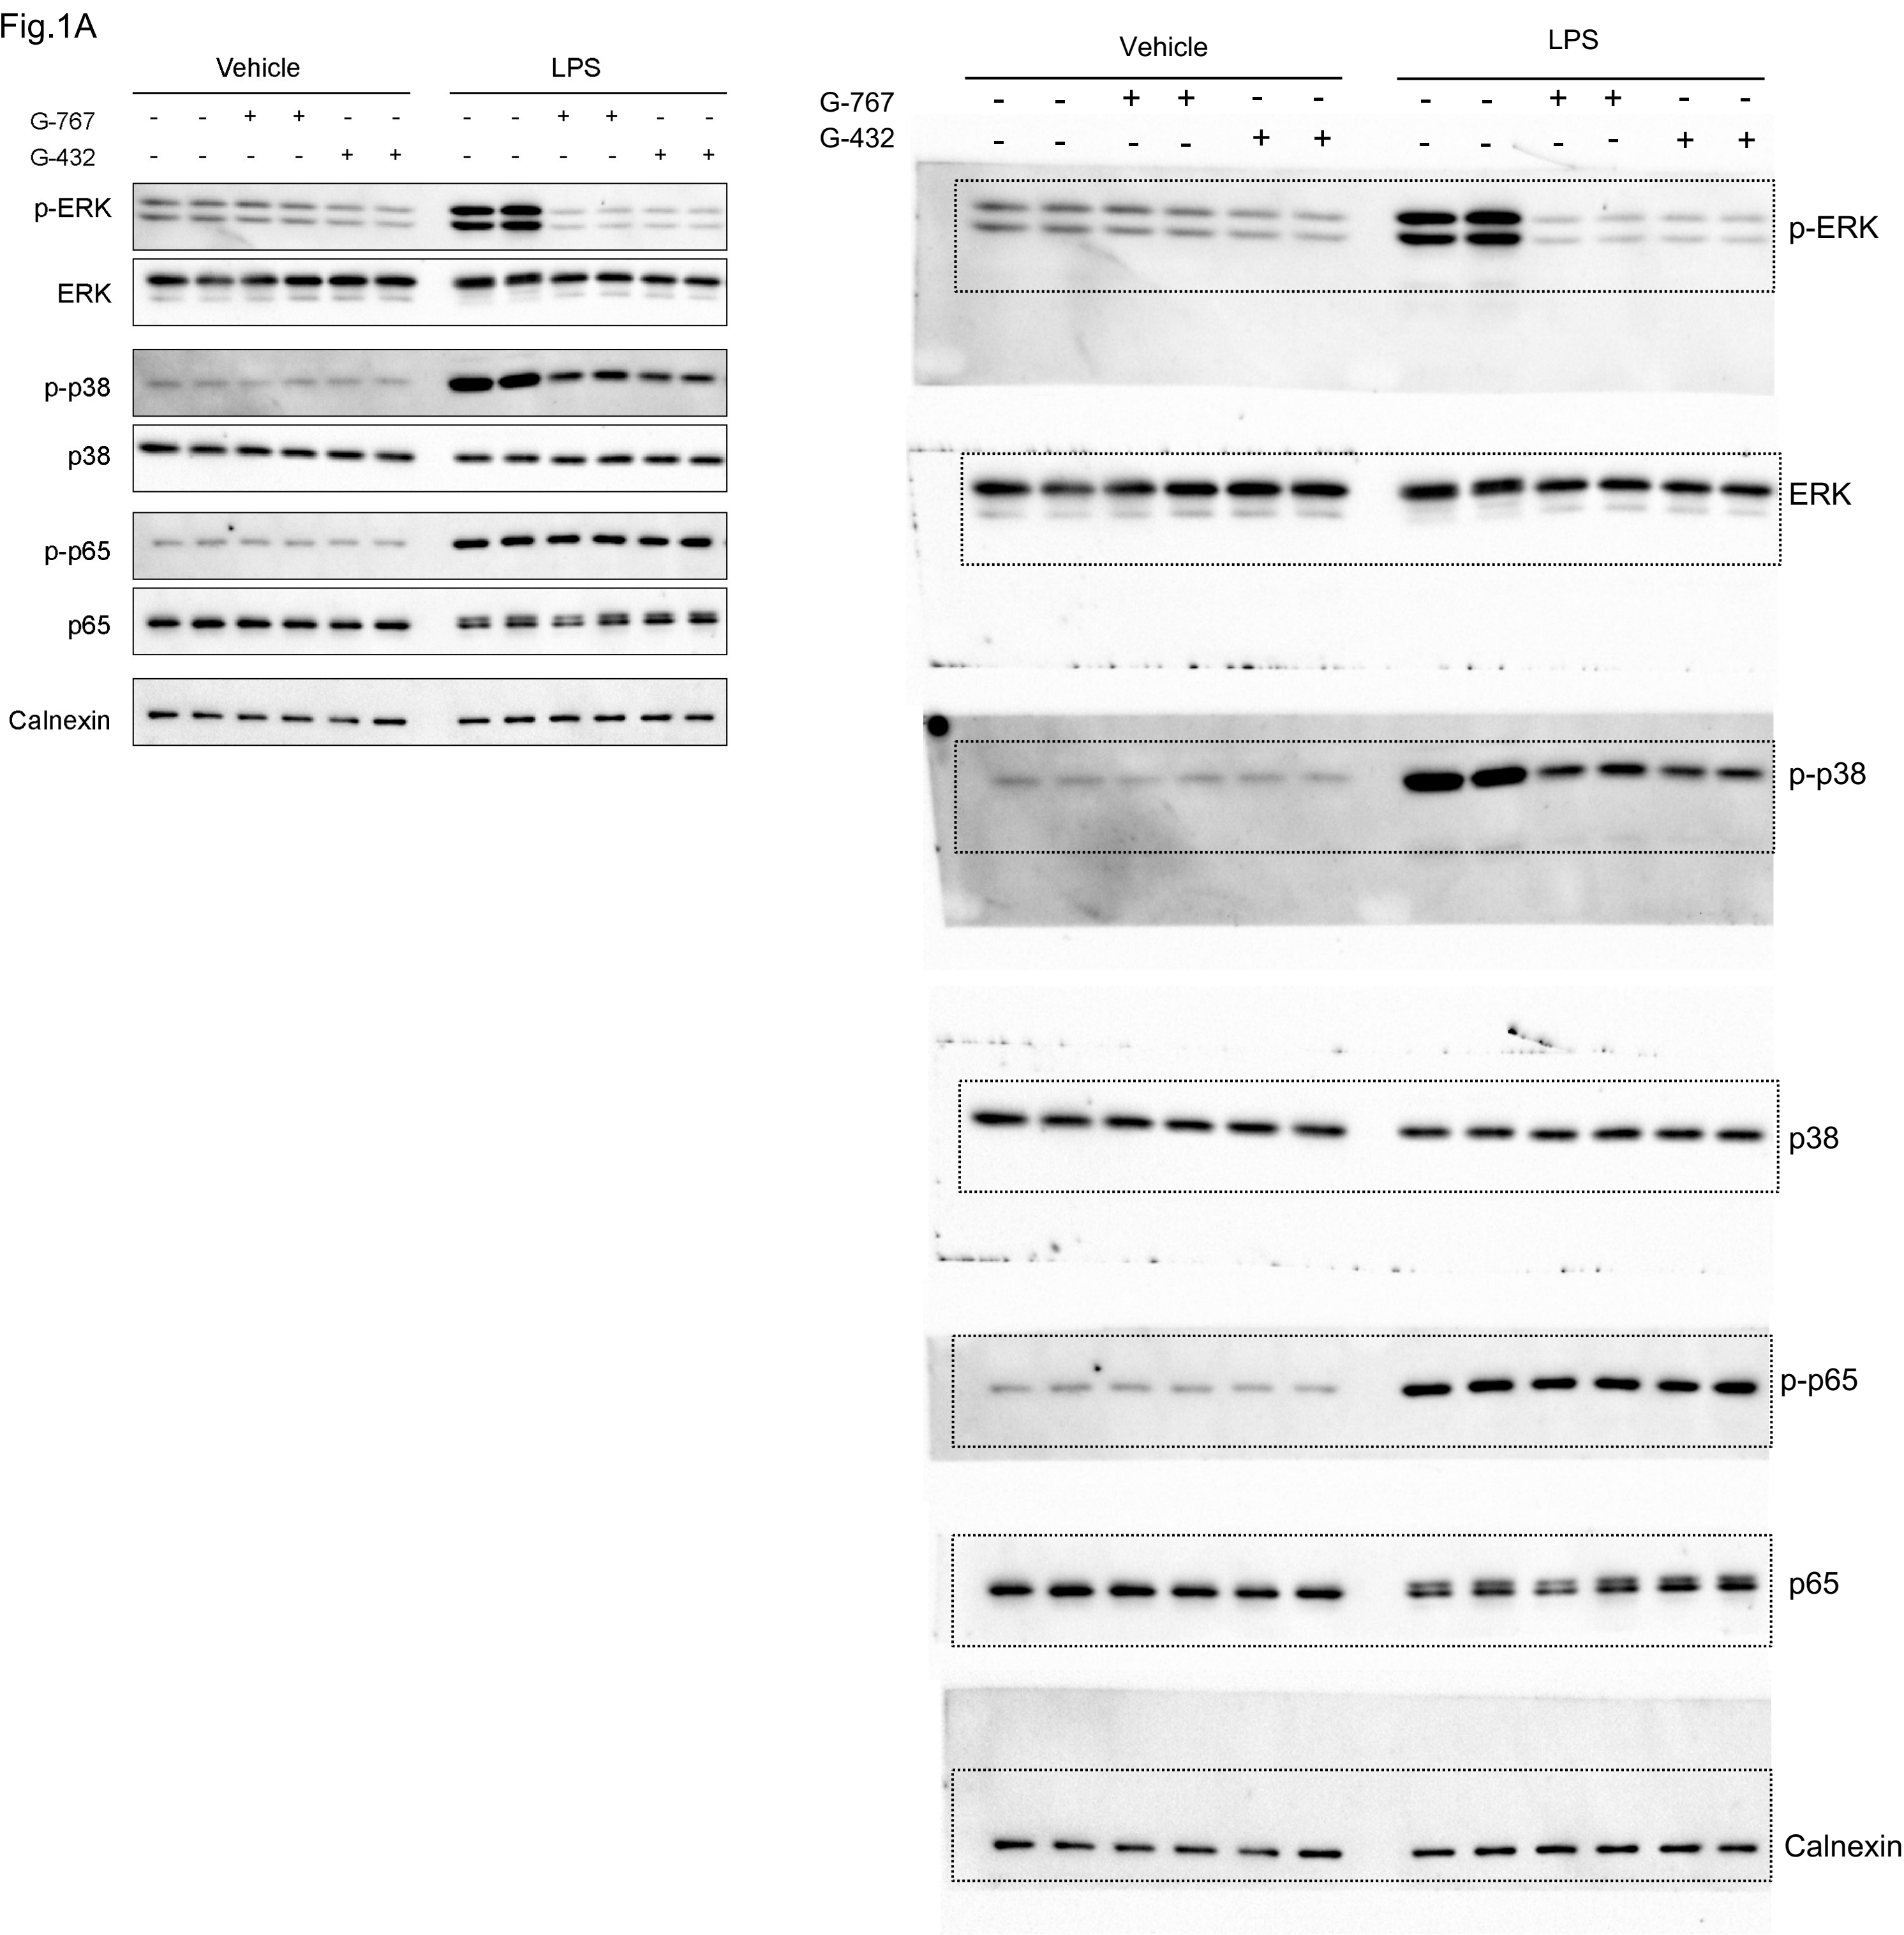

Fig. 1A - source data.  
Full images of the western blots.

Supplement: fig1-data1 [file elife-83451-fig1-data1-v1.zip]

Figure 2C and 2D source data

Fig. 2C

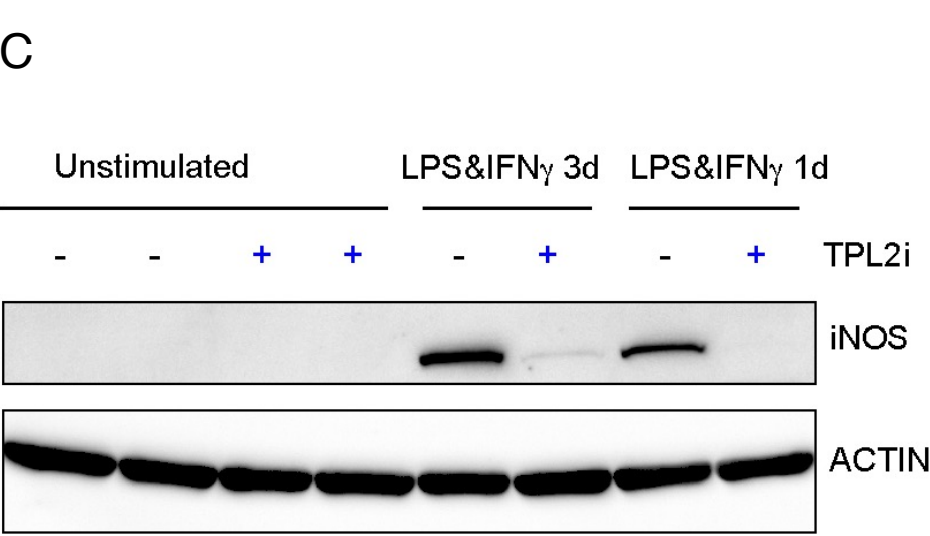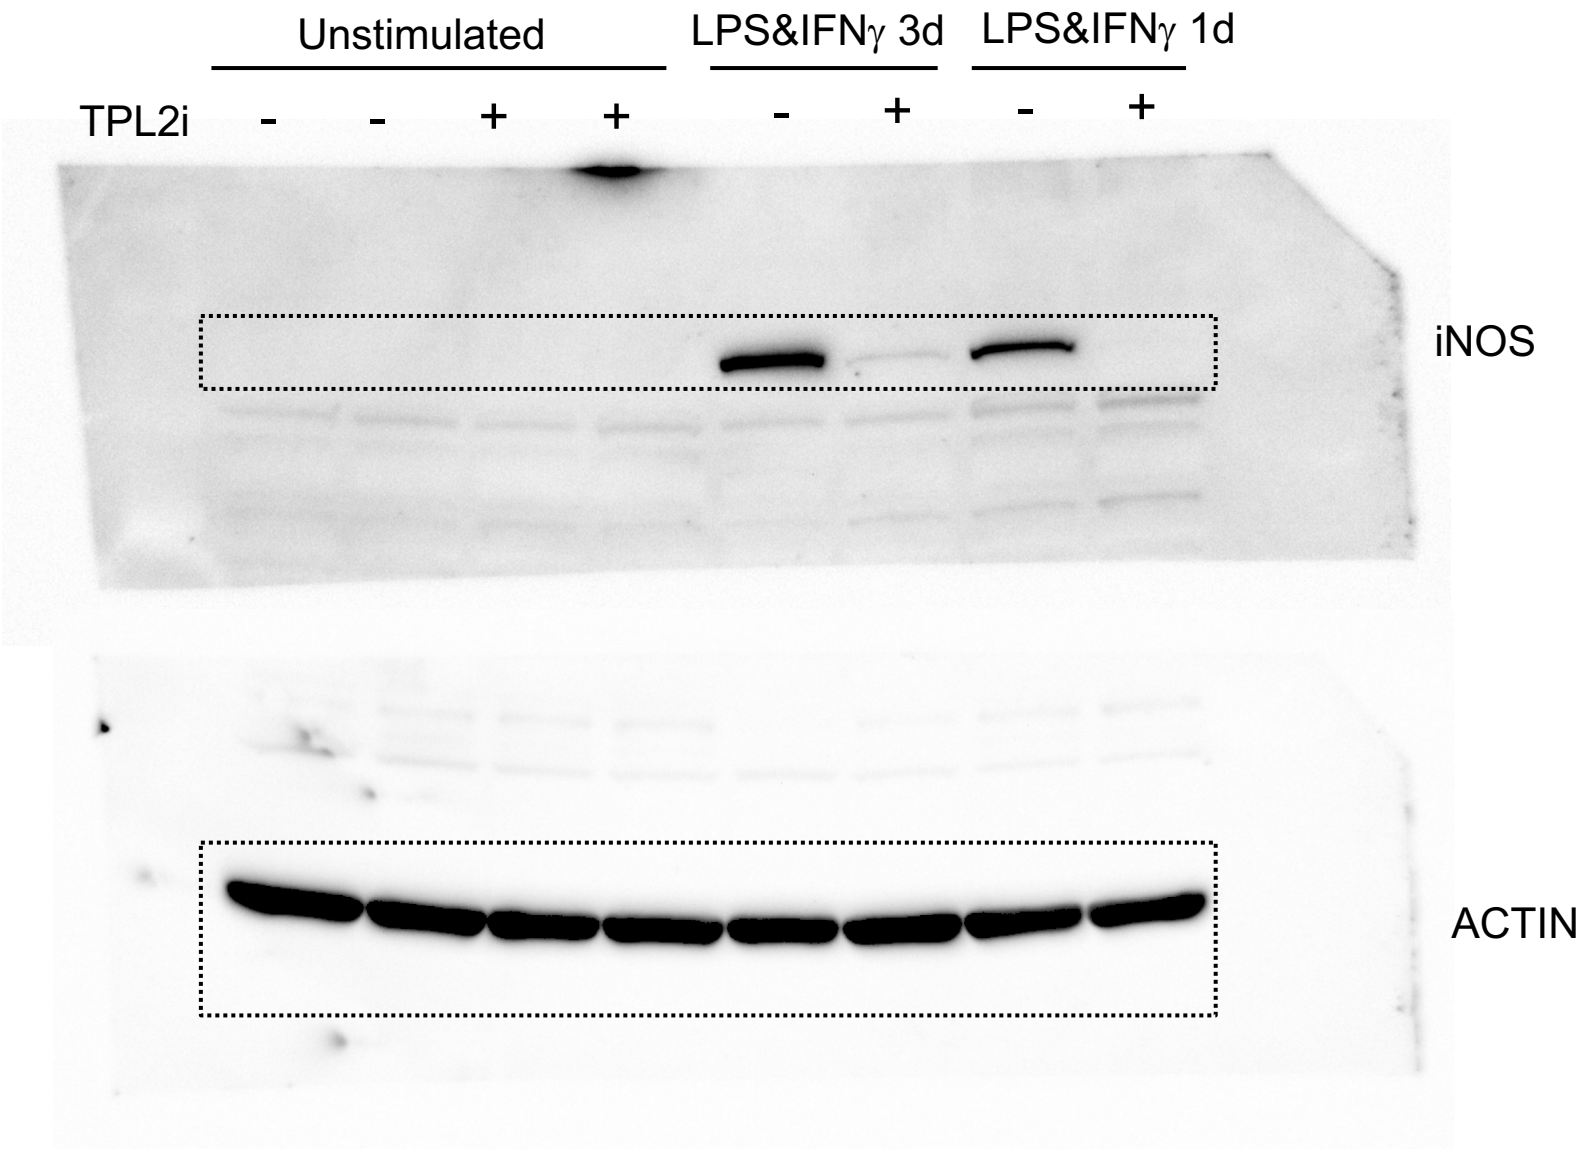

Fig. 2D

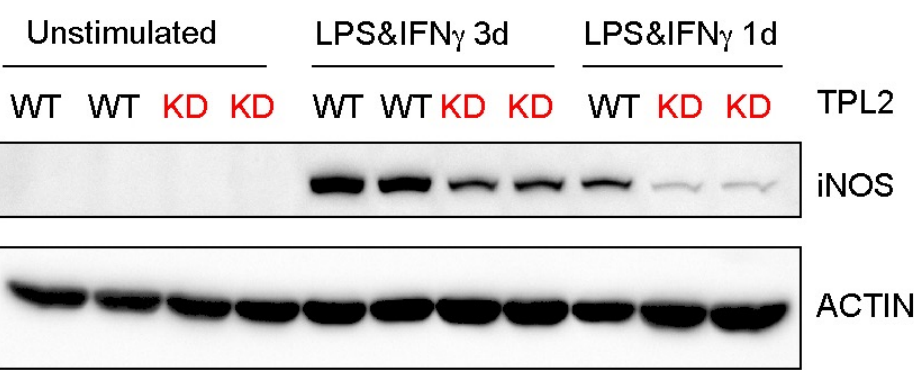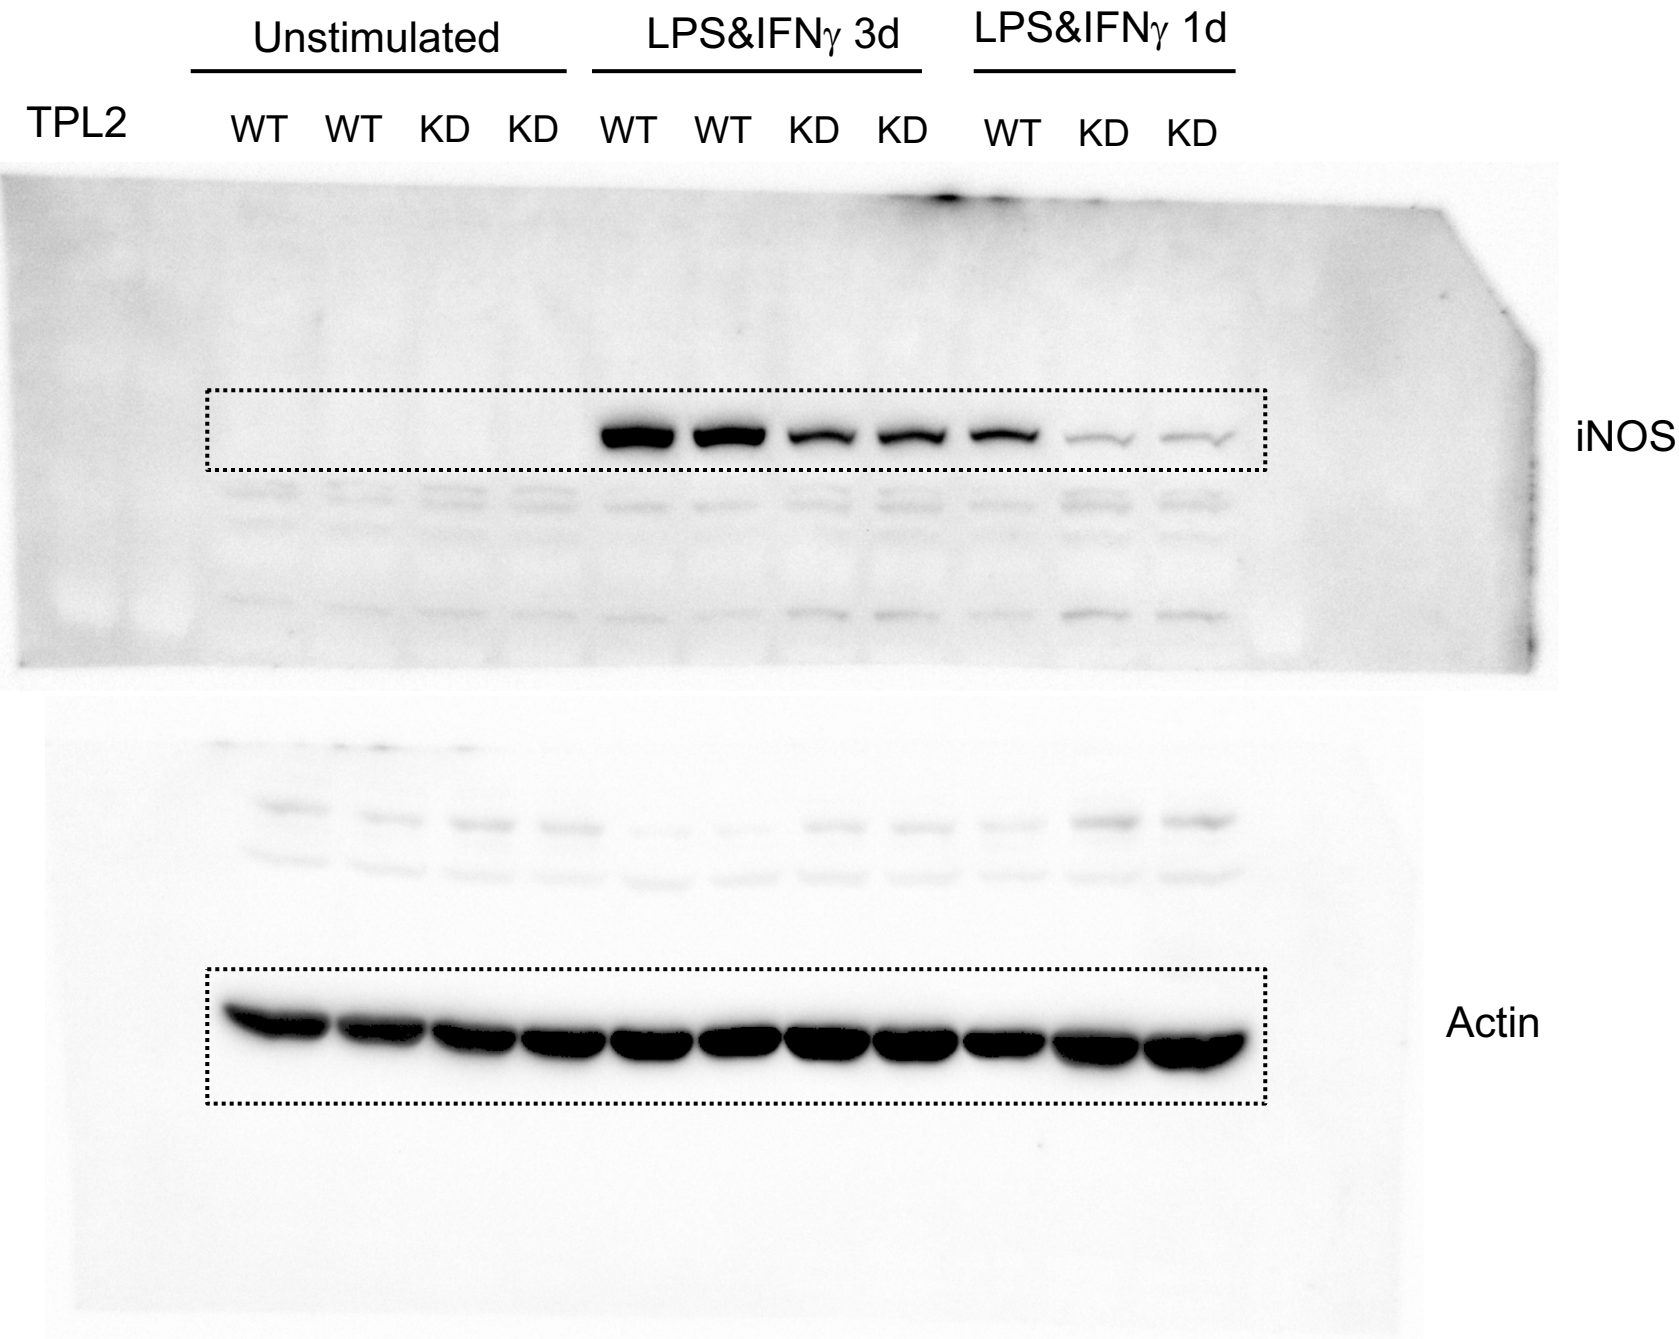

**Fig. 2 - source data.**  
Full images of the western blots.

Supplement: fig2-data1 [file elife-83451-fig2-data1-v1.zip]
